# Supplementary material
Source: PubMed Central journal article supplement (PMC3503459)
Supplement: ct200390j_si_001.pdf [file ct200390j_si_001.pdf]

# Supplementary Material

## Implicit solvation parameters derived from explicit water forces in large-scale Molecular Dynamics simulations

Jens Kleinjung,<sup>†</sup> Walter R.P. Scott,<sup>‡</sup> Jane R. Allison,<sup>¶</sup> Wilfred F. van Gunsteren,<sup>¶</sup>  
and Franca Fraternali<sup>\*,§</sup>

*Division of Mathematical Biology, MRC National Institute for Medical Research, The Ridgeway, Mill Hill, London NW7 1AA, United Kingdom, Chemistry Department, University of British Columbia, 2036 Main Mall, Vancouver, British Columbia, Canada V6T 1Z1, Laboratory of Physical Chemistry, Swiss Federal Institute of Technology Zürich, ETH Hönggerberg, CH-8093 Zürich, Switzerland, and Randall Division of Cell and Molecular Biophysics, King's College London, New Hunt's House, London SE1 1UL, United Kingdom*

E-mail: franca.fraternali@kcl.ac.uk

---

\*To whom correspondence should be addressed

<sup>†</sup>NIMR London

<sup>‡</sup>University of British Columbia

<sup>¶</sup>ETH Zürich

<sup>§</sup>King's College London

## Figure Legends

**Figure S1** Distribution of atomic SASA values  $A_i$  for all GROMOS atom types included in this study.

**Figure S2** Distribution of the size of the explicit solvent (water) forces  $\mathbf{f}_i^{expl}$  for the GROMOS atom types and for different data sets. The grey distributions show the forces on  $\langle ALL \rangle$  atoms. The overlaid coloured distributions show subsets: the  $\langle SA \rangle$  forces in orange, the  $\langle SA \ \& \ \theta+ \rangle$  forces in blue. Insets show the  $\langle SA \ \& \ \theta+ \rangle$  data in a uniform scale of  $10^4$  data points for a quantitative comparison of the atom type frequency. The selected atom types are the same as in Figure S1.

**Figure S3** Distribution of the angle  $\theta_i$  between the explicit and implicit force vectors for the GROMOS atom types. The atom type selection, data subsets and colour scheme are the same as in Figure S2.

**Figure S4** Distribution of the subset  $\sigma_{\langle SA \rangle}^{SASA}$  values as function of the atomic SASA value  $A_i$  for the GROMOS atom types.

**Figure S5** Distribution of the subset  $\sigma_{\langle SA \ \& \ \theta+ \rangle}^{SASA}$  values as function of the atomic SASA value  $A_i$  for the GROMOS atom types.

**Figure S6** Q–Q plots showing the log-normal behaviour of  $\langle ALL \rangle$  water forces. Sampled water forces  $\mathbf{f}_{\langle ALL \rangle}^{smp}$  are plotted over a theoretical log-normal distribution  $\mathbf{f}_{\langle ALL \rangle}^{heo}$ .  $\mathbf{f}_{\langle ALL \rangle}^{heo}$  are 1000 points from a distribution with 'mean' and 'sd' as estimated from a fit of the  $\mathbf{f}_{\langle ALL \rangle}^{expl}$  distribution.  $\mathbf{f}_{\langle ALL \rangle}^{smp}$  are 1000 points sampled from the  $\mathbf{f}_{\langle ALL \rangle}^{expl}$  distribution. An ideal log-normal distribution would follow the diagonal (solid line). Plots are scaled to the range of frequently occurring forces.

**Figure S7** Q–Q plots of water forces of the  $\langle SA \rangle$  subset. The selection on SASA does not change the log–normal shape of the distribution.

**Figure S8** Q–Q plots of the  $\langle SA \ \& \ \theta+ \rangle$  water forces. The selection on SASA and angle range does not change the log–normal shape of the distribution.

**Figure S9** Q–Q plots of re–sampled  $\langle SA \ \& \ \theta+ \rangle$  forces over  $\langle SA \rangle$  forces. The distribution of the  $\langle SA \ \& \ \theta+ \rangle$  forces were re–sampled to fit the ‘mean’ and ‘sd’ values of the  $\langle SA \rangle$  force distribution. The re–sampled distributions are both log–normal.

**Figure S10** Ratio  $I_{norm}$  of the Mutual Information and the Joint Entropy between the GROMOS atom type classification and the atom groups derived by partitioning. The partitions were computed on the basis of  $\sigma_i^{SASA}$  value ranges (bins) of  $1 \text{ kJ mol}^{-1} \text{ nm}^{-2}$ . The partitioning shows a relative information maximum at 3 groups.

**Figure S11** Local structural properties of the test proteins trp (a,b), drk (c,d), ubq (e,f) and lys (g,h). in implicit solvent (a,c,e,g) and water (b,d,f,h). Colour scheme: red, helical (including  $\alpha$ –helix); blue: extended (including  $\beta$ –strand); green-yellow: turns and loops. Conformations were plotted every 25 ps.

Figure S1

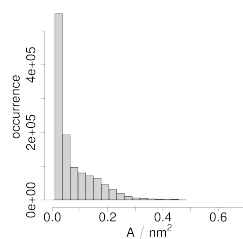

(a) atom type 1 O

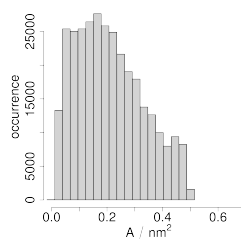

(b) atom type 2 OM

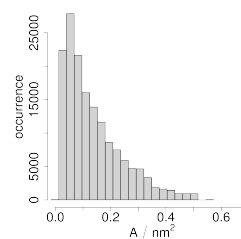

(c) atom type 3 OA

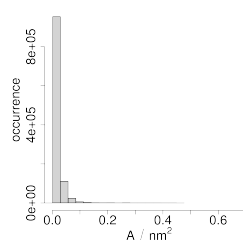

(d) atom type 5 N

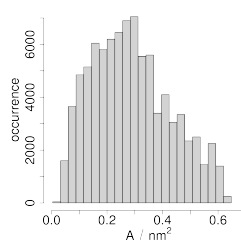

(e) atom type 6 NT

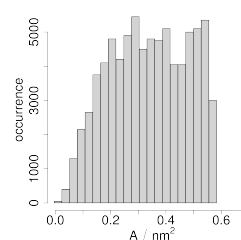

(f) atom type 7 NL

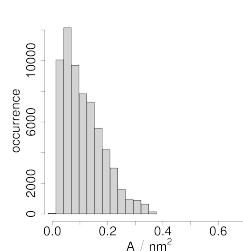

(g) atom type 8 NR

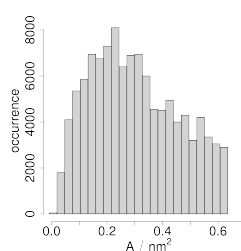

(h) atom type 9 NZ

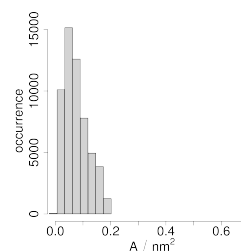

(i) atom type 10 NE

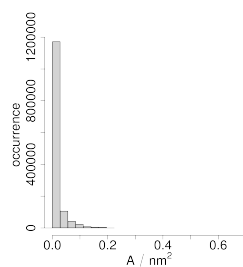

(j) atom type 11 C

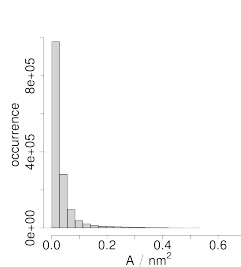

(k) atom type 12 CH

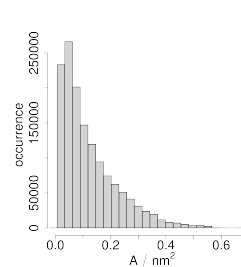

(l) atom type 13 CH2

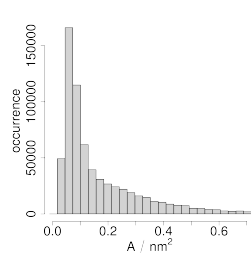

(m) atom type 14 CH3

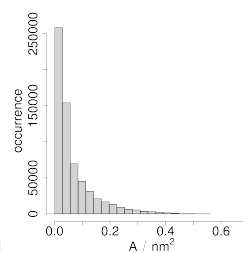

(n) atom type 16 CR1

Figure S2

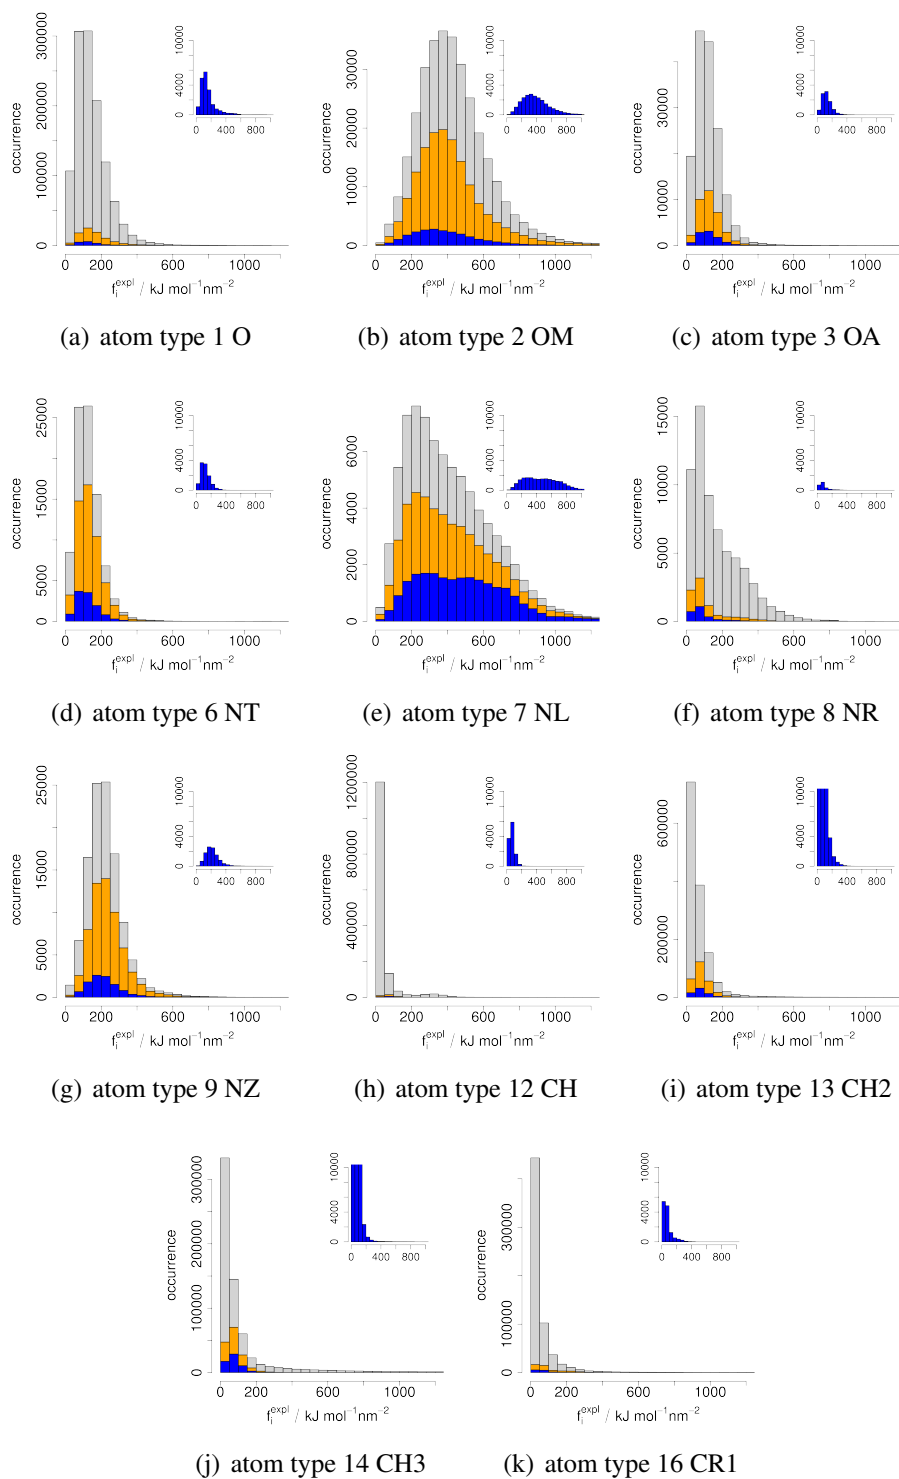

Figure S3

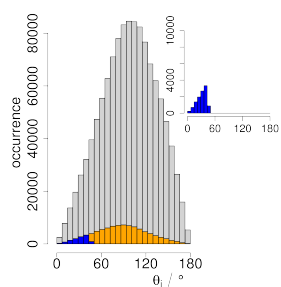

(a) atom type 1 O

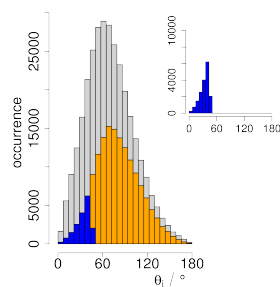

(b) atom type 2 OM

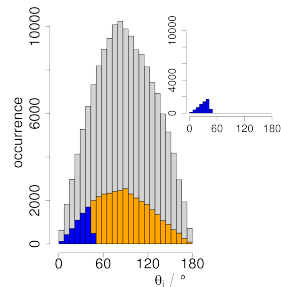

(c) atom type 3 OA

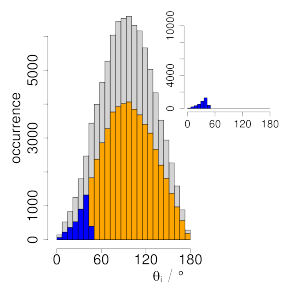

(d) atom type 6 NT

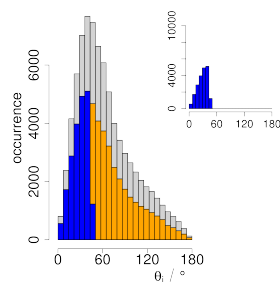

(e) atom type 7 NL

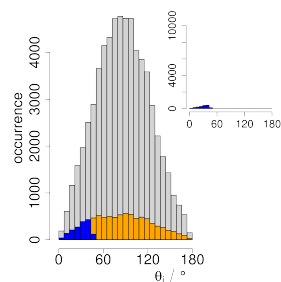

(f) atom type 8 NR

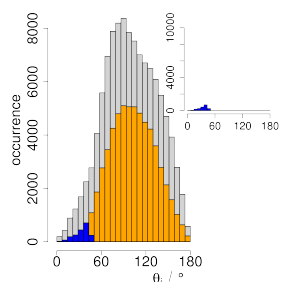

(g) atom type 9 NZ

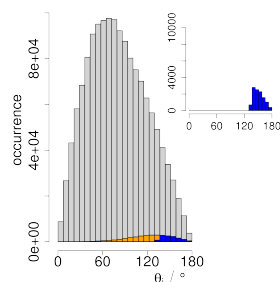

(h) atom type 12 CH

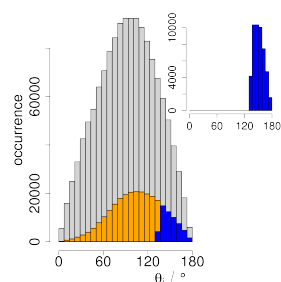

(i) atom type 13 CH2

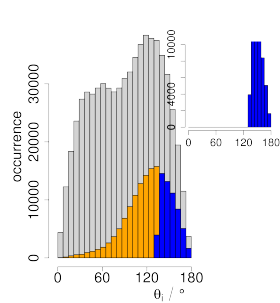

(j) atom type 14 CH3

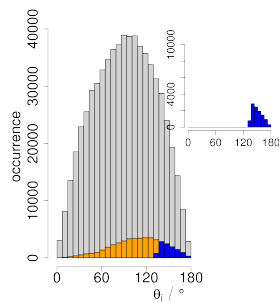

(k) atom type 16 CR1

Figure S4

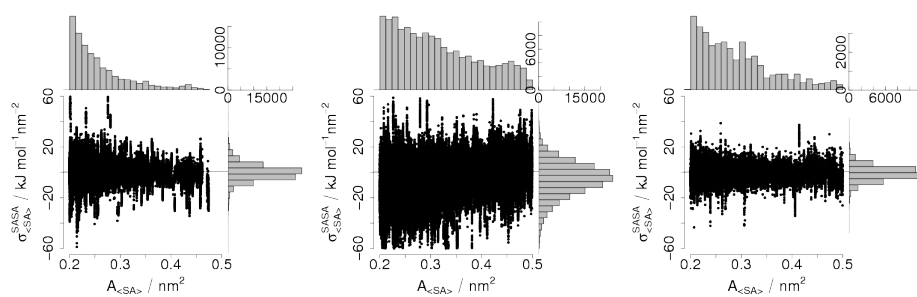

(a) atom type 1 O

(b) atom type 2 OM

(c) atom type 3 OA

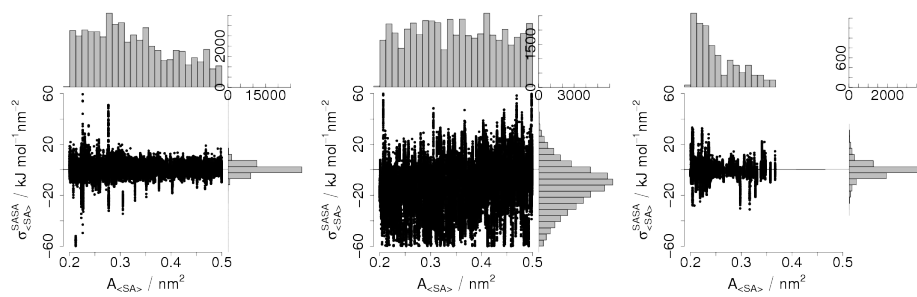

(d) atom type 6 NT

(e) atom type 7 NL

(f) atom type 8 NR

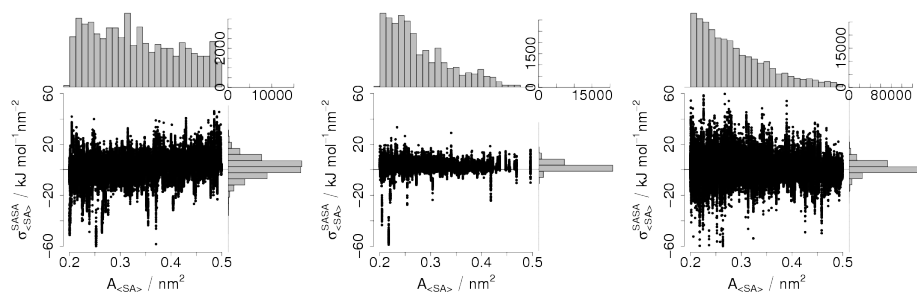

(g) atom type 9 NZ

(h) atom type 12 CH

(i) atom type 13 CH2

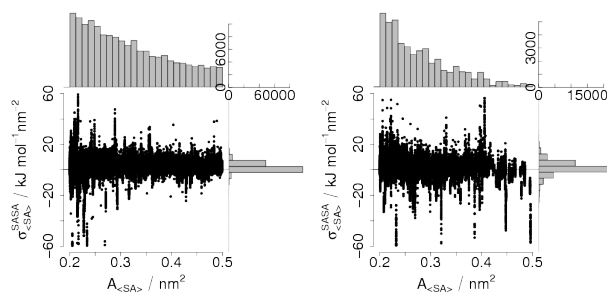

(j) atom type 14 CH3

(k) atom type 16 CR1

Figure S5

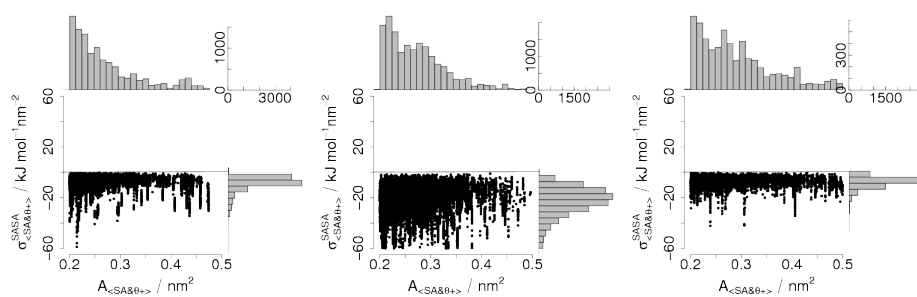

(a) atom type 1 O

(b) atom type 2 OM

(c) atom type 3 OA

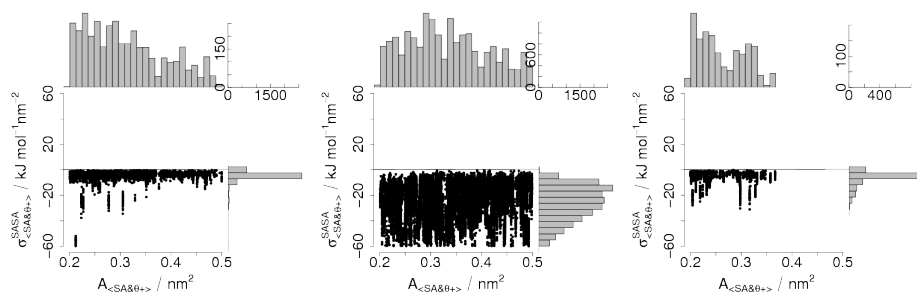

(d) atom type 6 NT

(e) atom type 7 NL

(f) atom type 8 NR

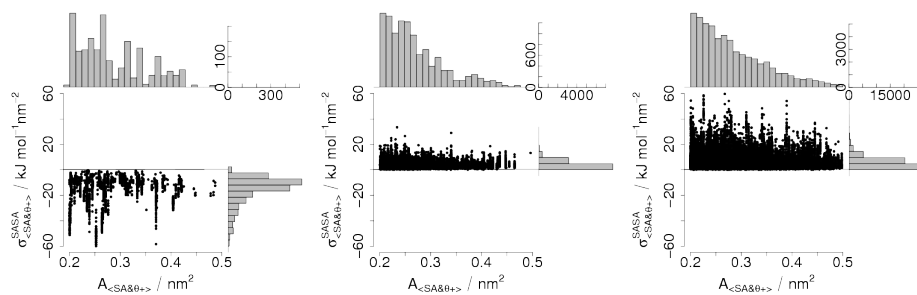

(g) atom type 9 NZ

(h) atom type 12 CH

(i) atom type 13 CH2

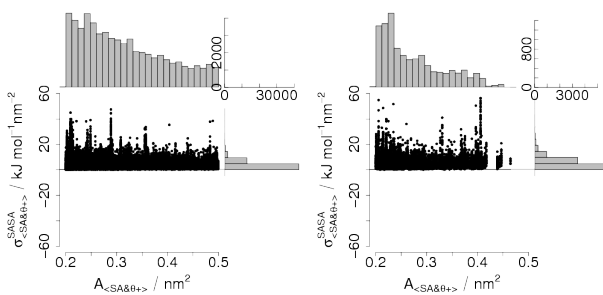

(j) atom type 14 CH3

(k) atom type 16 CR1



Figure S6

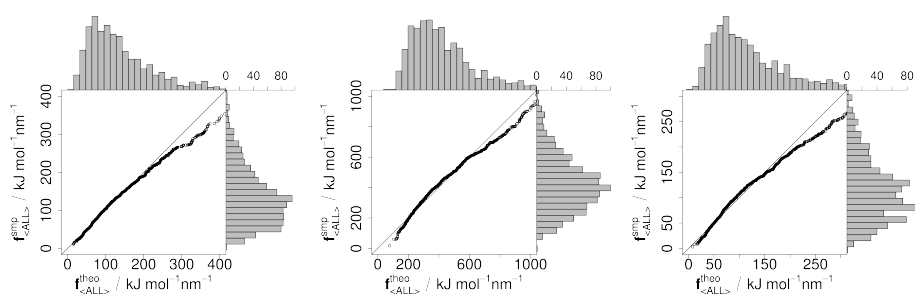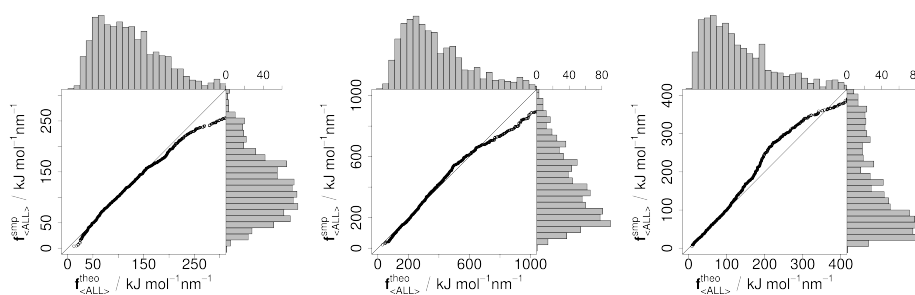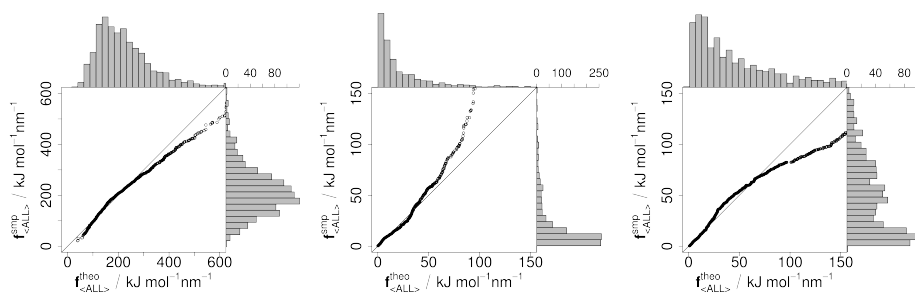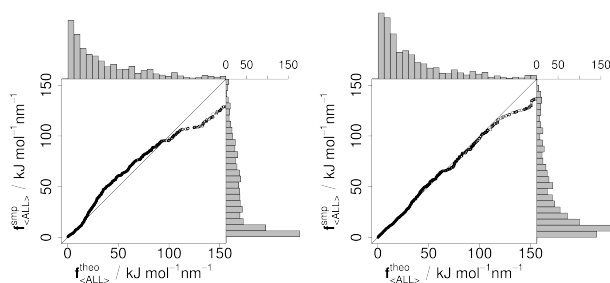

Figure S7

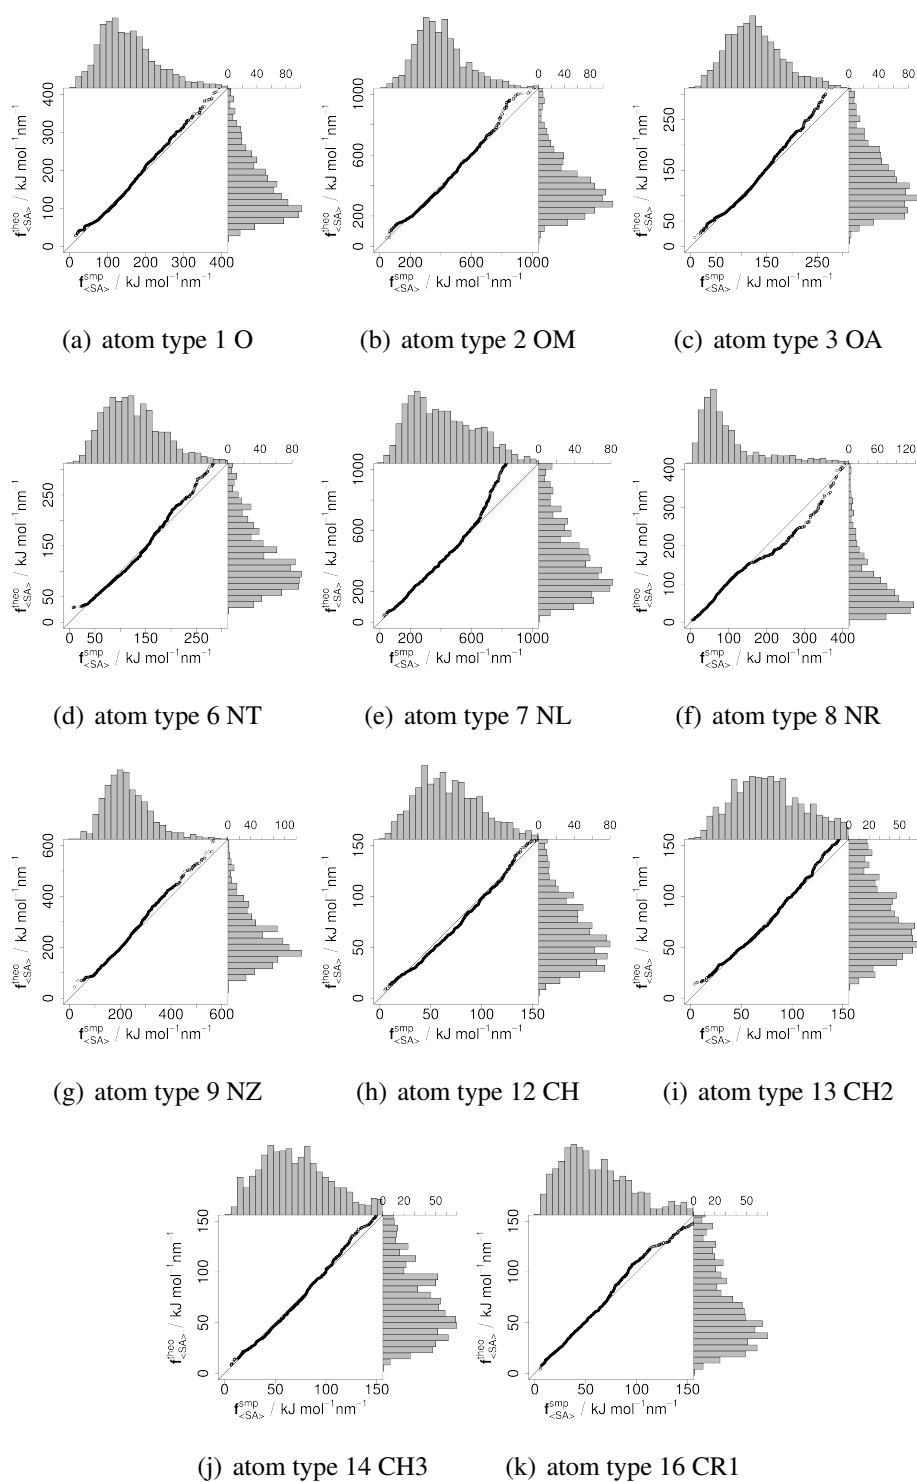

Figure S8

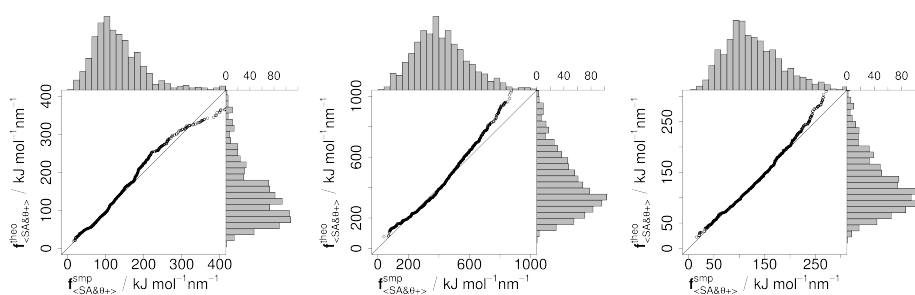

(a) atom type 1 O

(b) atom type 2 OM

(c) atom type 3 OA

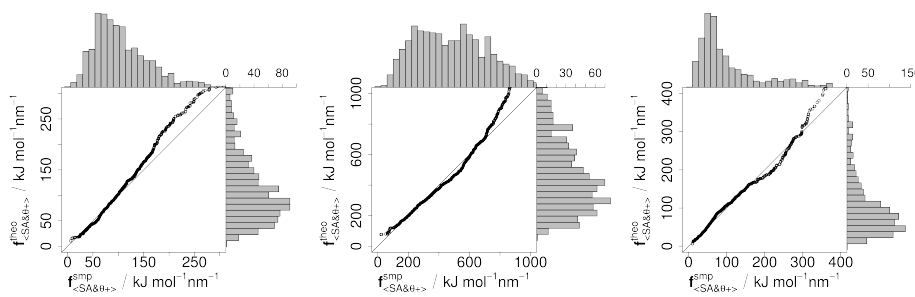

(d) atom type 6 NT

(e) atom type 7 NL

(f) atom type 8 NR

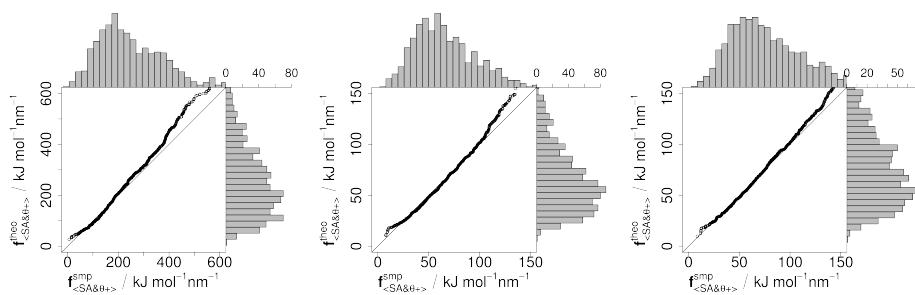

(g) atom type 9 NZ

(h) atom type 12 CH

(i) atom type 13 CH2

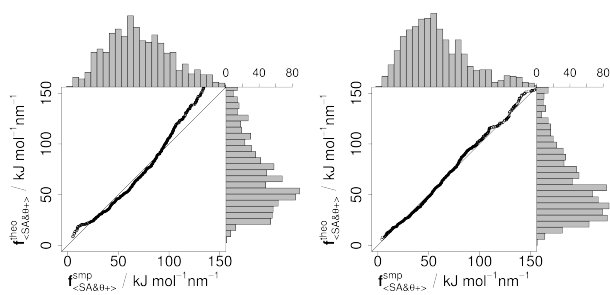

(j) atom type 14 CH3

(k) atom type 16 CR1

Figure S9

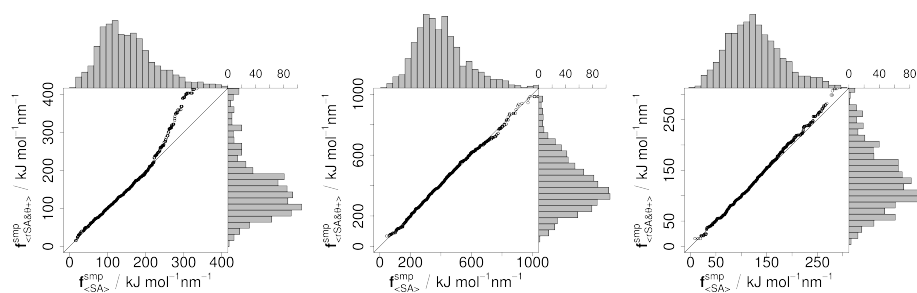

(a) atom type 1 O

(b) atom type 2 OM

(c) atom type 3 OA

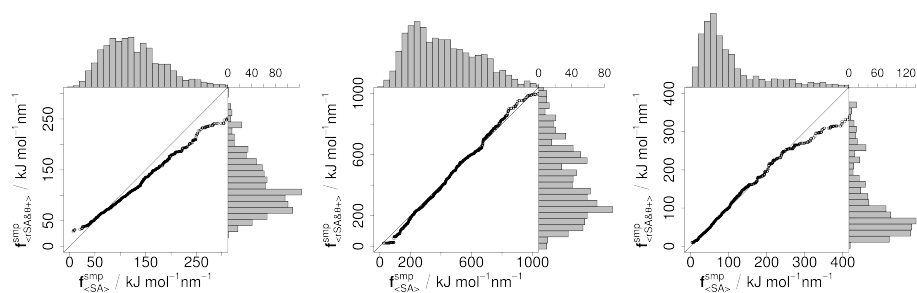

(d) atom type 6 NT

(e) atom type 7 NL

(f) atom type 8 NR

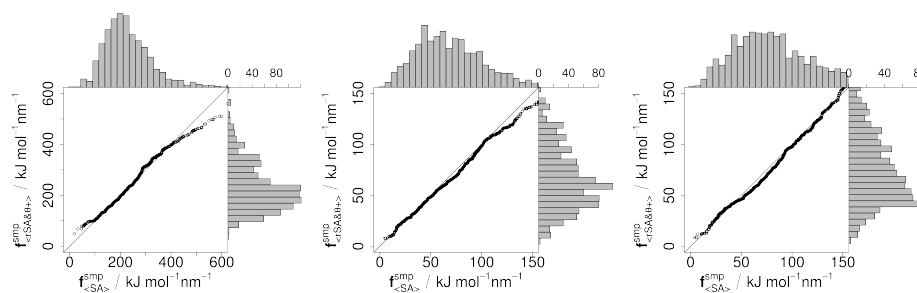

(g) atom type 9 NZ

(h) atom type 12 CH

(i) atom type 13 CH2

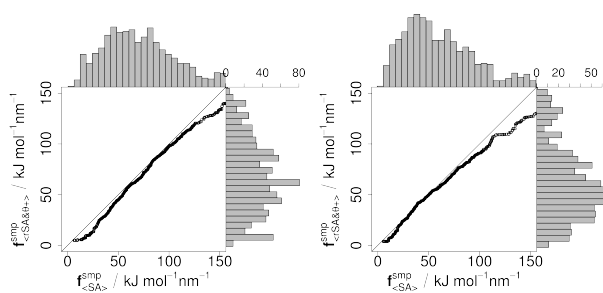

(j) atom type 14 CH3

(k) atom type 16 CR1

Figure S10

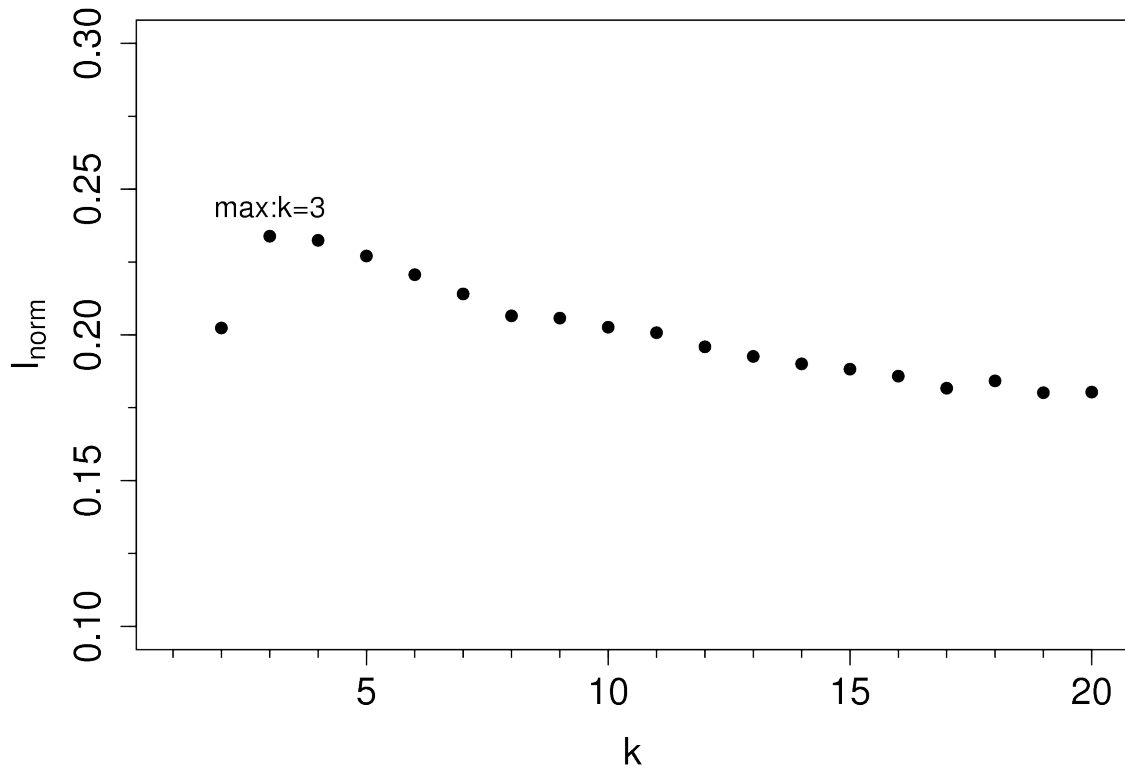

Figure S11

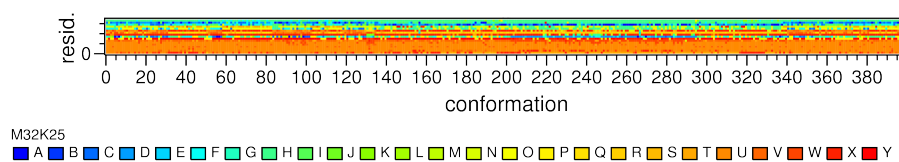

(a) trp (112y) in implicit solvent

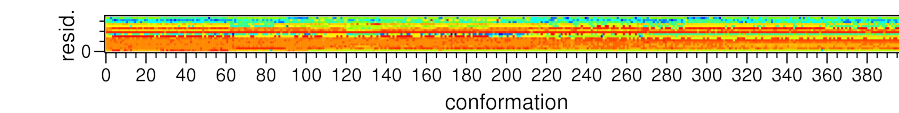

(b) trp (112y) in explicit solvent

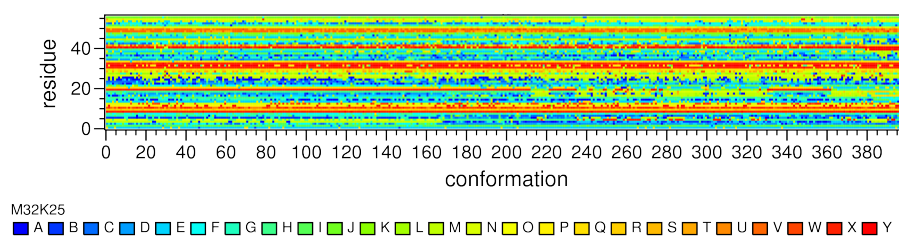

(c) drk (2a36) in implicit solvent

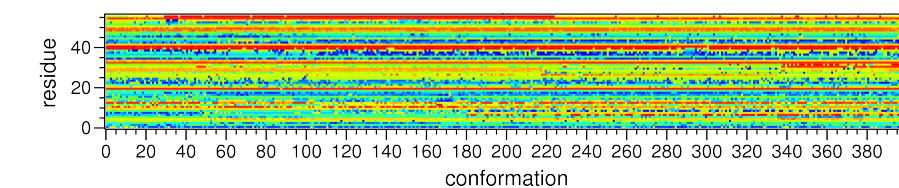

(d) drk (2a36) in explicit solvent

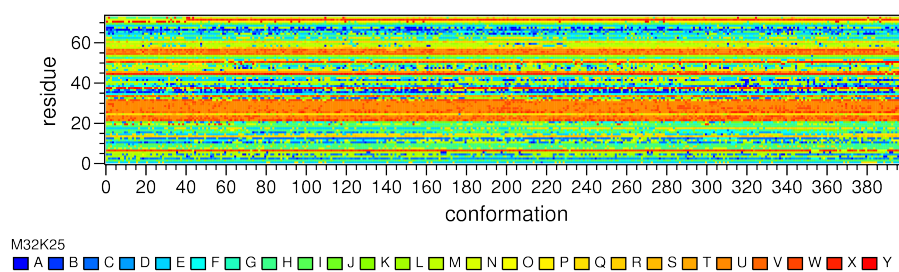

(e) ubq (1ubq) in implicit solvent

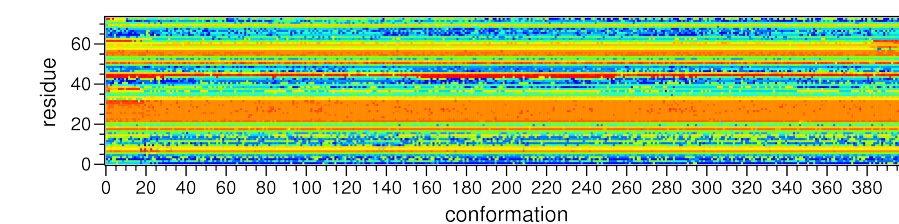

(f) ubq (1ubq) in explicit solvent

Figure S11

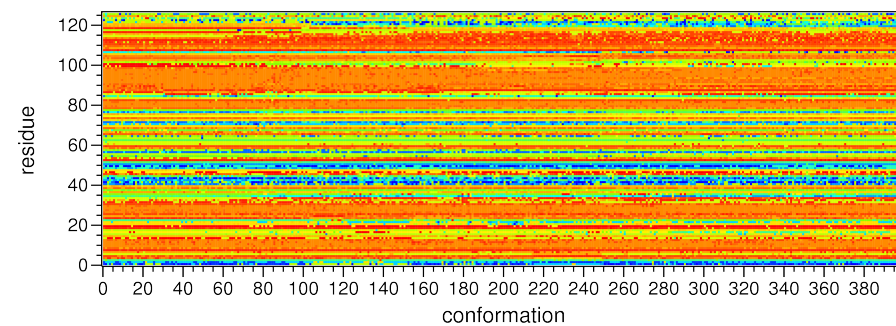

M32K25  
 ■ A ■ B ■ C ■ D ■ E ■ F ■ G ■ H ■ I ■ J ■ K ■ L ■ M ■ N ■ O ■ P ■ Q ■ R ■ S ■ T ■ U ■ V ■ W ■ X ■ Y

(a) lys (1aki) in implicit solvent

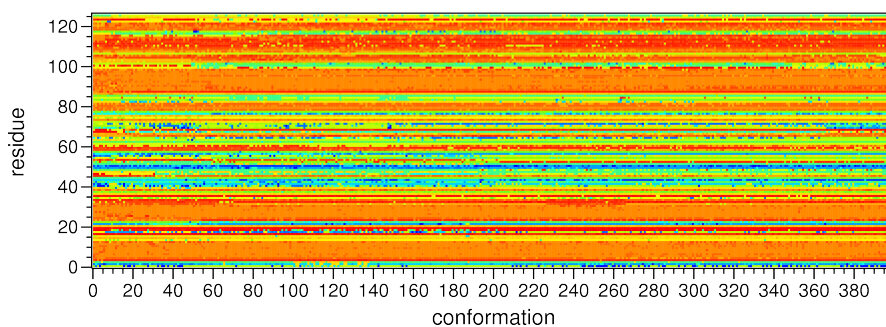

(b) lys (1aki) in explicit solvent

Table S1: Topological alphabet defined by the super-secondary structure of two successive  $\alpha$  or  $\beta$  elements and the angle between their central axis. The combination of super-secondary structure and angle range defines a 'state', which is denoted by the letter given in the table.

| angle range/ $^{\circ}$ | $\beta$ - $\beta$ | $\beta$ - $\alpha$ | $\alpha$ - $\beta$ | $\alpha$ - $\alpha$ |
|-------------------------|-------------------|--------------------|--------------------|---------------------|
| 0-60                    | a                 | d                  | g                  | j                   |
| 60-120                  | b                 | e                  | h                  | k                   |
| 120-180                 | c                 | f                  | i                  | l                   |

Table S2: Characteristics of the protein domains used in this study for the implicit solvent parametrisation. The last six proteins (t1 to t6) belong to the performance test set. Columns: domain, domain identifier of the SCOP ASTRAL40 database;<sup>1</sup> description, SCOP protein name and domain/chain specification; topology, topological string defining the sequence and relative orientation of secondary structure elements (see Methods); class, SCOP domain classification;  $N_{res}$ , number of residues;  $N_{cha}$ , absolute net charge; SPACI, the SPACI structure quality score of the SCOP ASTRAL database (a SPACI score  $\geq 0.4$  indicates a 'good' structure).

| id. | domain  | description                                         | topology  | class     | $N_{res}$ | $N_{cha}$ | SPACI |
|-----|---------|-----------------------------------------------------|-----------|-----------|-----------|-----------|-------|
| 1   | d1a2pa_ | Bamase                                              | jjkgbaab  | d.1.1.2   | 108       | 2         | 0.80  |
| 2   | d1a8l_2 | Protein disulfide oxidoreductase                    | ggdgdha   | c.47.1.2  | 107       | 4         | 0.53  |
| 3   | d1aa7a_ | Influenza virus matrix protein M1                   | jjjgffjgg | a.95.1.1  | 158       | 2         | 0.49  |
| 4   | d1ash__ | Hemoglobin (domain I)                               | jjjjjjkg  | a.1.1.2   | 147       | 4         | 0.48  |
| 5   | d1ay7b_ | Barstar (barnase inhibitor)                         | ddlgdjg   | c.9.1.1   | 89        | 6         | 0.69  |
| 6   | d1b37a2 | Polyamine oxidase                                   | bbaadjga  | d.16.1.5  | 112       | 1         | 0.58  |
| 7   | d1b66a_ | 6-pyruvoyl tetrahydropterin synthase                | ddhdjjga  | d.96.1.2  | 138       | 1         | 0.53  |
| 8   | d1b8da_ | Phycocerythrin alpha subunit                        | jjjjjkj   | a.1.1.3   | 164       | 2         | 0.55  |
| 9   | d1bd8__ | Cell cycle inhibitor p19ink4D                       | jjjjjj    | d.211.1.1 | 156       | 4         | 0.63  |
| 10  | d1bea__ | Hageman factor/amylase inhibitor                    | jjjgbdg   | a.52.1.2  | 116       | 1         | 0.40  |
| 11  | d1bhta1 | Hepatocyte growth factor                            | aaadgaaa  | g.10.1.1  | 92        | 12        | 0.48  |
| 12  | d1bi5a2 | Chalcone synthase                                   | aaadgdjgg | c.95.1.2  | 154       | 6         | 0.82  |
| 13  | d1bm8__ | DNA-binding domain of MluI-box binding protein MBP1 | aaadgje   | d.34.1.1  | 99        | 6         | 0.63  |



| id. | domain  | description                            | topology  | class     | $N_{res}$ | $N_{cha}$ | SPACI |
|-----|---------|----------------------------------------|-----------|-----------|-----------|-----------|-------|
| 14  | d1c02a_ | Phosphorelay protein ypd1              | jjjigdgd  | a.24.10.2 | 166       | 0         | 0.60  |
| 15  | d1c0pa2 | D-aminoacid oxidase                    | aaaaadh   | d.16.1.3  | 95        | 1         | 1.01  |
| 16  | d1c52__ | Cytochrome c552                        | kkjgaadkj | a.3.1.1   | 131       | 7         | 0.93  |
| 17  | d1c8ual | Thioesterase II                        | ggdgaaba  | d.38.1.3  | 114       | 0         | 0.54  |
| 18  | d1cg5b_ | Hemoglobin, beta-chain                 | jjjkjjj   | a.1.1.2   | 141       | 3         | 0.71  |
| 19  | d1coja2 | Mn superoxide dismutase                | kkgacdj   | d.44.1.1  | 122       | 2         | 0.61  |
| 20  | d1cot__ | Cytochrome c6 (cytochrome c553)        | ggadcejl  | a.3.1.1   | 121       | 3         | 0.62  |
| 21  | d1cqxa1 | Hemoglobin I                           | jjhdjjj   | a.1.1.2   | 150       | 7         | 0.61  |
| 22  | d1cs6a1 | Axonin-1                               | aaabbaa   | b.1.1.4   | 97        | 4         | 0.61  |
| 23  | d1cxya_ | Cytochrome b558                        | ggadjjge  | d.120.1.1 | 81        | 5         | 0.65  |
| 24  | d1cyo__ | Cytochrome b5                          | ddgadjjjj | d.120.1.1 | 88        | 5         | 0.74  |
| 25  | d1d0qa_ | Zinc-binding domain of DNA primase     | jjgbafk   | g.41.3.2  | 102       | 3         | 0.59  |
| 26  | d1d3ba_ | D3 core SNRNP protein                  | ggacaaa   | b.38.1.1  | 72        | 2         | 0.53  |
| 27  | d1d3bb_ | B core SNRNP protein                   | aaacaaa   | b.38.1.1  | 81        | 4         | 0.53  |
| 28  | d1dp7p_ | Class II MHC transcription factor RFX1 | ggadgdga  | a.4.5.20  | 76        | 6         | 0.71  |
| 29  | d1dq3a3 | PI-Pfui intein                         | ddidgad   | d.95.2.2  | 98        | 3         | 0.54  |
| 30  | d1dq3a4 | PI-Pfui intein                         | jjgadgadj | d.95.2.2  | 109       | 2         | 0.54  |
| 31  | d1dqa_  | Moth pheromone-binding protein         | jjlkjg    | a.39.2.1  | 137       | 8         | 0.60  |

| id. | domain  | description                                                  | topology  | class     | $N_{res}$ | $N_{cha}$ | SPACI |
|-----|---------|--------------------------------------------------------------|-----------|-----------|-----------|-----------|-------|
| 32  | d1duga1 | Class pi Glutathione S-transferase                           | jjjjjjg   | a.45.1.1  | 140       | 2         | 0.66  |
| 33  | d1duga2 | Class pi Glutathione S-transferase                           | ddgdhad   | c.47.1.5  | 80        | 2         | 0.66  |
| 34  | d1dvoa_ | Repressor of bacterial conjugation FinO                      | kkhgdjg   | a.136.1.1 | 152       | 7         | 0.57  |
| 35  | d1e42a2 | Beta2-adaptin AP2, C-terminal subdomain                      | ggegaaa   | d.105.1.1 | 113       | 1         | 0.62  |
| 36  | d1e6ba2 | Class pi Glutathione S-transferase                           | ddgdiad   | c.47.1.5  | 80        | 1         | 0.65  |
| 37  | d1eara2 | Urease metallochaperone UreE, C-terminal domain              | ddgadga   | d.58.38.1 | 68        | 3         | 0.61  |
| 38  | d1ed1a_ | SIV matrix antigen                                           | ggejjkg   | a.61.1.1  | 114       | 2         | 0.50  |
| 39  | d1eexg_ | Diol dehydratase, gamma subunit                              | ggejjjj   | a.23.2.1  | 137       | 1         | 0.59  |
| 40  | d1ej8a_ | Copper chaperone for superoxide dismutase, C-terminal domain | aaaaaaa   | b.1.8.1   | 140       | 1         | 0.67  |
| 41  | d1ekga_ | C-terminal domain of frataxin                                | ggaaaadg  | d.82.2.1  | 119       | 7         | 0.59  |
| 42  | d1enfa1 | Staphylococcal enterotoxin H                                 | ggbadgc   | b.40.2.2  | 100       | 4         | 0.70  |
| 43  | d1enfa2 | Staphylococcal enterotoxin H                                 | aadgbdg   | d.15.6.1  | 112       | 5         | 0.70  |
| 44  | d1eqfa1 | TAFII250 double bromodomain module                           | ddjlgdjjj | a.29.2.1  | 139       | 5         | 0.50  |
| 45  | d1et9a2 | Streptococcal superantigen Spe-H                             | bbdgadg   | d.15.6.1  | 109       | 4         | 0.54  |
| 46  | d1evha_ | Enabled/VASP homology 1 domain                               | bbaaaaa   | b.55.1.4  | 111       | 4         | 0.54  |
| 47  | d1exra_ | Troponin C                                                   | kkgdjkgd  | a.39.1.5  | 146       | 25        | 1.19  |
| 48  | d1eyva_ | Antitermination factor NusB                                  | jjgdjkkj  | a.79.1.1  | 131       | 4         | 0.73  |
| 49  | d1f00i1 | Intimin                                                      | aaabaaa   | b.1.14.1  | 95        | 0         | 0.52  |

| id. | domain  | description                                        | topology  | class     | N <sub>res</sub> | N <sub>cha</sub> | SPACI |
|-----|---------|----------------------------------------------------|-----------|-----------|------------------|------------------|-------|
| 50  | d1f7ta_ | Holo-(acyl carrier protein) synthase ACPS          | ddjjgaa   | d.150.1.2 | 119              | 6                | 0.62  |
| 51  | d1fc3a_ | Spo0A                                              | jjjjkjl   | a.4.6.3   | 119              | 4                | 0.46  |
| 52  | d1fp2a1 | Isoflavone O-methyltransferase                     | jjgdkgae  | a.4.5.29  | 101              | 3                | 0.76  |
| 53  | d1g4ia_ | Phospholipase A2                                   | kkkkgadg  | a.133.1.2 | 123              | 1                | 1.18  |
| 54  | d1g73d_ | BIR domains of XIAP                                | jjjadjj   | g.52.1.1  | 102              | 3                | 0.46  |
| 55  | d1gaka_ | SP18                                               | ddjjjge   | a.19.1.1  | 137              | 15               | 0.54  |
| 56  | d1glqa1 | Glutathione S-transferase, C-terminal domain       | jjjjjjk   | a.45.1.1  | 131              | 2                | 0.64  |
| 57  | d1glqa2 | Glutathione S-transferase, N-terminal domain       | ddgdjhad  | c.47.1.5  | 78               | 0                | 0.64  |
| 58  | d1go3f_ | RNA polymerase II subunit RBP7                     | ddjkjjk   | a.60.8.2  | 107              | 7                | 0.63  |
| 59  | d1gpqa_ | Inhibitor of vertebrate lysozyme                   | jjgdhaaad | d.233.1.1 | 127              | 4                | 0.69  |
| 60  | d1gsma1 | Mucosal addressin cell adhesion molecule-1         | ccaaaaa   | b.1.1.4   | 90               | 4                | 0.48  |
| 61  | d1gtfa_ | Trp RNA-binding attenuation protein                | aaabaaa   | b.82.5.1  | 69               | 0                | 0.63  |
| 62  | d1h4ra2 | Moesin                                             | aaacaad   | b.55.1.5  | 99               | 8                | 0.65  |
| 63  | d1h7wa5 | Dihydropyrimidine dehydrogenase, C-terminal domain | kkkgadg   | d.58.1.5  | 173              | 1                | 0.59  |
| 64  | d1h9ka1 | Cytoplasmic molybdate-binding protein ModG         | aaaaadga  | b.40.6.2  | 76               | 1                | 0.60  |
| 65  | d1hfoa_ | MIF-related                                        | ddgaadg   | d.80.1.3  | 113              | 0                | 0.60  |
| 66  | d1hqz1_ | Cofilin-like domain of actin-binding protein abp1p | ggfgadgd  | d.109.1.2 | 139              | 10               | 0.49  |
| 67  | d1hufa_ | YopH tyrosine phosphatase N-terminal domain        | ggaegdgb  | d.195.1.1 | 123              | 0                | 0.46  |

| id. | domain  | description                                                | topology  | class      | N <sub>res</sub> | N <sub>cha</sub> | SPACI |
|-----|---------|------------------------------------------------------------|-----------|------------|------------------|------------------|-------|
| 68  | d1hyua3 | Alkyl hydroperoxide reductase subunit F, N-terminal domain | ggdgabd   | c.47.1.2   | 102              | 2                | 0.55  |
| 69  | d1hyua4 | Alkyl hydroperoxide reductase subunit F, N-terminal domain | ggdgdhf   | c.47.1.2   | 96               | 5                | 0.55  |
| 70  | d1i4ga2 | Staphylococcal enterotoxin A                               | aaegadg   | d.15.6.1   | 113              | 0                | 0.50  |
| 71  | d1i4ma_ | Prion protein domain                                       | aaadgel   | d.6.1.1    | 108              | 4                | 0.54  |
| 72  | d1i7na1 | Synapsin I                                                 | ddgaaaaad | c.30.1.5   | 102              | 1                | 0.50  |
| 73  | d1in4a1 | Holliday junction helicase RuvB                            | kkkgae    | a.4.5.11   | 75               | 1                | 0.68  |
| 74  | d1iow_1 | D-Ala-D-Ala ligase                                         | ddgdgdg   | c.30.1.2   | 96               | 5                | 0.52  |
| 75  | d1iq6a_ | (R)-specific enoyl-CoA hydratase                           | ddkjgaab  | d.38.1.4   | 132              | 2                | 0.76  |
| 76  | d1it2a_ | Hagfish hemoglobin                                         | ddjjkj    | a.1.1.2    | 146              | 2                | 0.60  |
| 77  | d1iuja_ | Hypothetical protein TT1380                                | ddgadkg   | d.58.4.5   | 102              | 2                | 0.61  |
| 78  | d1iyha1 | Glutathione S-transferase, C-terminal domain               | jijijjh   | a.45.1.1   | 124              | 5                | 0.65  |
| 79  | d1j3wa_ | Giding protein MglB                                        | ggaegaad  | d.110.7.1  | 134              | 5                | 0.78  |
| 80  | d1jd1b_ | Highdosage growth inhibitor YER057cp                       | aaadgdg   | d.79.1.1   | 125              | 4                | 0.62  |
| 81  | d1jffa1 | Aspartate racemase                                         | ddgdjgdg  | c.78.2.1   | 115              | 4                | 0.60  |
| 82  | d1k0ia2 | p-Hydroxybenzoate hydroxylase                              | aaaaaej   | d.16.1.2   | 102              | 1                | 0.58  |
| 83  | 1k8kdI  | ARPC2                                                      | ggaadji   | d.198.2.1  | 120              | 3                | 0.48  |
| 84  | d1klxa_ | Cysteine rich protein B                                    | jijijjid  | a.118.18.1 | 133              | 9                | 0.59  |
| 85  | d1knca_ | Antioxidant defense protein AhpD                           | jijijji   | a.152.1.1  | 174              | 1                | 0.52  |

| id. | domain  | description                                           | topology | class      | N <sub>res</sub> | N <sub>cha</sub> | SPACI |
|-----|---------|-------------------------------------------------------|----------|------------|------------------|------------------|-------|
| 86  | d1krha2 | Benzoate dioxygenase reductase                        | ddgdgcd  | c.25.1.2   | 133              | 6                | 0.66  |
| 87  | d1ks9a1 | Ketopantoate reductase PanE                           | kkjgdkk  | a.100.1.7  | 124              | 4                | 0.56  |
| 88  | d1kwma2 | Pancreatic carboxypeptidase, activation domain        | ddgbdgf  | d.58.3.1   | 95               | 4                | 0.73  |
| 89  | d1kyfa2 | Alpa-adaptin AP2, C-terminal subdomain                | ddgdgaaa | d.105.1.1  | 114              | 1                | 0.94  |
| 90  | d1le6a_ | Snake phospholipase A2                                | jjkgbdg  | a.133.1.2  | 123              | 5                | 0.54  |
| 91  | d1lj9a_ | Transcriptional regulator SlyA                        | jjkkgad  | a.4.5.28   | 144              | 3                | 0.66  |
| 92  | d1luqa_ | Streptavidin                                          | aaabaad  | b.61.1.1   | 119              | 0                | 1.15  |
| 93  | d1m2da_ | Thioredoxin-like 2Fe-2S ferredoxin                    | ddjgaad  | c.47.1.11  | 101              | 1                | 1.06  |
| 94  | d1m4ra_ | Interleukin-22                                        | ffjkjjj  | a.26.1.3   | 142              | 0                | 0.55  |
| 95  | d1mbya_ | Serine/threonine-protein kinase Sak C-terminal domain | aaaaaad  | d.223.1.1  | 75               | 0                | 0.47  |
| 96  | d1mg4a_ | Doublecortin-like kinase Dclk                         | aadhaad  | d.15.11.1  | 101              | 6                | 0.78  |
| 97  | d1mgta2 | O6-alkylguanine-DNA alkyltransferase                  | aaadgadj | c.55.7.1   | 88               | 0                | 0.66  |
| 98  | d1mola_ | Monellin                                              | ddgaaab  | d.17.1.1   | 94               | 2                | 0.66  |
| 99  | d1mu5a2 | Topoisomerase VI-B subunit                            | ggaadgae | d.14.1.3   | 164              | 0                | 0.50  |
| 100 | d1mwxal | Penicillin binding protein 2a, N-terminal domain      | jjkgaaab | d.17.4.5   | 112              | 4                | 0.54  |
| 101 | d1n5ua2 | Serum albumin                                         | jjjjkkjj | a.126.1.1  | 192              | 9                | 0.52  |
| 102 | d1n7ea_ | Discs large protein homolog                           | aaacdkg  | b.36.1.1   | 95               | 1                | 0.71  |
| 103 | d1n8va_ | Chemosensory protein Csp2                             | jjjhdkj  | a.118.21.1 | 101              | 1                | 0.84  |

| id. | domain  | description                                 | topology | class      | $N_{res}$ | $N_{cha}$ | SPACI |
|-----|---------|---------------------------------------------|----------|------------|-----------|-----------|-------|
| 104 | dlnbua_ | 7,8-dihydroneopterin aldolase               | aafgdjjg | d.96.1.3   | 118       | 5         | 0.63  |
| 105 | dln6a_  | Hypothetical protein YqeY                   | jjjjkj   | a.182.1.1  | 148       | 1         | 0.81  |
| 106 | dln6a_  | Protozoan/bacterial hemoglobin              | jjjkjj   | a.1.1.1    | 126       | 5         | 0.50  |
| 107 | dlnh2a2 | TATA-box binding protein                    | aadgaabd | d.129.1.1  | 85        | 3         | 0.58  |
| 108 | dlnya1  | Triple functional domain protein TRIO       | kkjkjjj  | a.87.1.1   | 184       | 8         | 0.66  |
| 109 | dloiub1 | Cyclin A                                    | kkjjgdjk | a.74.1.1   | 133       | 4         | 0.48  |
| 110 | dloiub2 | Cyclin A                                    | jjjjkkg  | a.74.1.1   | 123       | 1         | 0.48  |
| 111 | dlok7a3 | DNA polymerase III, beta subunit            | ddgaadga | d.131.1.1  | 122       | 5         | 0.63  |
| 112 | dlopc__ | OmpR                                        | aaadkkg  | a.4.6.1    | 99        | 1         | 0.47  |
| 113 | dlopd__ | Histidine-containing phosphocarrier protein | ddgadgd  | d.94.1.1   | 85        | 4         | 0.66  |
| 114 | dlosya_ | Fungal immunomodulatory protein             | ggcaaca  | b.1.21.1   | 114       | 0         | 0.65  |
| 115 | dlo8a_  | Stringent starvation protein B              | ggabbaa  | b.136.1.1  | 106       | 5         | 0.71  |
| 116 | dloxja2 | RNA-binding protein Smaug                   | jjgdjjk  | a.118.1.13 | 108       | 6         | 0.61  |
| 117 | dloyja2 | Class pi GST                                | ddgdhbd  | c.47.1.5   | 84        | 4         | 0.57  |
| 118 | dlp0za_ | Sensor kinase CitA                          | jjjfgaa  | d.110.6.1  | 131       | 2         | 0.75  |
| 119 | dlp5dx2 | Phosphomannomutase/phosphoglucomutase       | ggdgaega | c.84.1.1   | 104       | 2         | 0.73  |
| 120 | dlp8xa1 | Gelsolin                                    | aaadgeg  | d.109.1.1  | 121       | 2         | 0.49  |
| 121 | dlp8xa2 | Gelsolin                                    | aacadgd  | d.109.1.1  | 96        | 1         | 0.49  |

| id. | domain  | description                                                    | topology  | class     | N <sub>res</sub> | N <sub>cha</sub> | SPACI |
|-----|---------|----------------------------------------------------------------|-----------|-----------|------------------|------------------|-------|
| 122 | d1p9ya_ | Trigger factor ribosome-binding domain                         | aadkgab   | d.241.2.1 | 117              | 1                | 0.50  |
| 123 | d1pama1 | Galactose oxidase, C-terminal domain                           | aaababa   | b.1.18.2  | 86               | 2                | 0.62  |
| 124 | d1pbwa_ | p50 RhoGAP domain                                              | jjkjjjj   | a.116.1.1 | 184              | 6                | 0.49  |
| 125 | d1pbya1 | Quinohemoprotein amine dehydrogenase A chain, domains 1 and 2  | ggbdgdj   | a.3.1.7   | 85               | 5                | 0.63  |
| 126 | d1pgva_ | Ribonuclease inhibitor                                         | lllllgd   | c.10.1.1  | 167              | 2                | 0.63  |
| 127 | d1poc__ | Phospholipase A2                                               | ggbdjgc   | a.133.1.1 | 134              | 2                | 0.48  |
| 128 | d1q1ca2 | FKBP52, N-terminal domain                                      | aaaauga   | d.26.1.1  | 117              | 6                | 0.57  |
| 129 | d1q3oa_ | Discs large protein homolog                                    | aaabdkg   | b.36.1.1  | 104              | 2                | 0.51  |
| 130 | d1q5za_ | Invasion protein A                                             | ddkjkkjjj | a.196.1.1 | 145              | 1                | 0.67  |
| 131 | d1qba_1 | Bacterial chitinase                                            | jjgbabaa  | b.1.18.2  | 105              | 4                | 0.63  |
| 132 | d1qksa1 | N-terminal (heme c) domain of cytochrome cd1-nitrite reductase | jjgadkjj  | a.3.1.2   | 127              | 9                | 0.86  |
| 133 | d1qzma_ | gamma subunit of DNA polymerase III, N-domain                  | jjgdjgd   | c.37.1.20 | 94               | 4                | 0.49  |
| 134 | d1r1ta_ | SmtB repressor                                                 | ddjgdkgad | a.4.5.5   | 98               | 1                | 0.66  |
| 135 | d1r26a_ | Thioredoxin                                                    | ddgdgdh   | c.47.1.1  | 113              | 5                | 0.83  |
| 136 | d1r5ra_ | Pheromone-binding protein asp1                                 | jjgdkjgd  | a.39.2.1  | 117              | 15               | 0.67  |
| 137 | d1r5ta_ | mono-domain cytidine deaminase                                 | ggadgbdga | c.97.1.1  | 141              | 0                | 0.53  |
| 138 | d1rewc_ | BMP receptor Ia ectodomain                                     | aaaadha   | g.7.1.3   | 86               | 4                | 0.49  |
| 139 | d1rgxa_ | Resistin                                                       | ggaaaaa   | g.77.1.1  | 89               | 2                | 0.51  |

| id. | domain  | description                                               | topology     | class     | $N_{res}$ | $N_{cha}$ | SPACI |
|-----|---------|-----------------------------------------------------------|--------------|-----------|-----------|-----------|-------|
| 140 | d1rlja_ | Flavoprotein NrdI                                         | ggdgdgdg     | c.23.5.7  | 135       | 0         | 0.49  |
| 141 | d1rlka_ | Hypothetical protein TA0108                               | ddjgdgad     | c.131.1.1 | 116       | 0         | 0.53  |
| 142 | d1rq2a2 | 2C-methyl-D-erythritol 2,4-cyclodiphosphate synthase IspF | ggdgdga      | d.79.2.1  | 107       | 0         | 0.57  |
| 143 | d1sdsa_ | Eukaryotic ribosomal protein L30                          | gggdgli      | d.79.3.1  | 115       | 2         | 0.63  |
| 144 | d1sh5a1 | Actin binding domain of plectin                           | ggdjgdgej    | a.40.1.1  | 120       | 5         | 0.56  |
| 145 | d1siha3 | Copper amine oxidase, domains 1 and 2                     | jjgaaaa      | d.17.2.1  | 115       | 11        | 0.69  |
| 146 | d1sra__ | C-terminal (EC) domain of BM-40/SPARC/osteonectin         | kkgdjijk     | a.39.1.3  | 151       | 10        | 0.54  |
| 147 | d1sumb_ | PhoU homolog TM1734                                       | jjjjjjg      | a.7.12.1  | 224       | 14        | 0.51  |
| 148 | d1szha_ | Her-1                                                     | jjkkkjj      | a.226.1.1 | 147       | 3         | 0.73  |
| 149 | d1t15a2 | Breast cancer associated protein                          | ddgbdgdg     | c.15.1.3  | 102       | 7         | 0.54  |
| 150 | d1tlja_ | Hypothetical protein PA1492                               | ddgejgdg     | c.137.1.1 | 119       | 6         | 0.63  |
| 151 | d1t7ra_ | Nuclear receptor ligand-binding domain                    | ggdjhjjjjgdg | a.123.1.1 | 250       | 5         | 0.82  |
| 152 | d1tfe__ | Elongation factor Ts, dimerisation domain                 | aadjljga     | d.43.1.1  | 142       | 3         | 0.64  |
| 153 | d1tlua_ | S-adenosylmethionine decarboxylase                        | ddjgaaadg    | d.156.1.2 | 117       | 6         | 0.69  |
| 154 | d1tuaa1 | Hypothetical protein APE0754                              | ddjgadaj     | d.51.1.1  | 84        | 1         | 0.74  |
| 155 | d1tuwa_ | Tetracenomycin polyketide synthesis protein TcmI          | ddjhadjg     | d.58.4.8  | 106       | 9         | 0.42  |
| 156 | d1ty0a2 | Streptococcal pyrogenic exotoxin Spe-J                    | aadgadg      | d.15.6.1  | 107       | 2         | 0.61  |
| 157 | d1u0sy_ | CheY protein                                              | ddlgdgdg     | c.23.1.1  | 118       | 0         | 0.54  |



| id. | domain  | description                                                 | topology | class     | N <sub>res</sub> | N <sub>cha</sub> | SPACI |
|-----|---------|-------------------------------------------------------------|----------|-----------|------------------|------------------|-------|
| 158 | d1udxa1 | Obg GTP-binding protein N-terminal domain                   | aaaaaca  | b.117.1.1 | 156              | 1                | 0.52  |
| 159 | d1udxa3 | Obg GTP-binding protein C-terminal domain                   | aadjjga  | d.242.1.1 | 76               | 3                | 0.52  |
| 160 | d1ugia_ | Uracil-DNA glycosylase inhibitor protein                    | ggadiaa  | d.17.5.1  | 83               | 12               | 0.63  |
| 161 | d1ugna1 | Vascular cell adhesion molecule-1                           | aaadjga  | b.1.1.4   | 96               | 2                | 0.56  |
| 162 | d1unnc_ | DNA polymerase IV                                           | ddgadha  | d.240.1.1 | 111              | 1                | 0.53  |
| 163 | d1ut9a2 | Cellulose 1,4-beta-cellobiosidase CbhA, precatalytic domain | aaaabaa  | b.1.18.2  | 98               | 3                | 0.52  |
| 164 | d1uvqa2 | Class II MHC alpha chain, N-terminal domain                 | aaaaadj  | d.19.1.1  | 83               | 3                | 0.64  |
| 165 | d1uw4a_ | RNA processing protein UPF3x, RRM domain                    | eegaadg  | d.58.7.4  | 90               | 3                | 0.56  |
| 166 | d1v74a_ | Colicin D nuclease domain                                   | kkgaiae  | d.243.1.1 | 107              | 2                | 0.60  |
| 167 | d1v97a4 | Xanthine oxidase, domain 4                                  | aaaafgd  | d.87.2.1  | 114              | 3                | 0.58  |
| 168 | d1vcla_ | Anti-sigma factor antagonist Spollaa                        | aadgdgdg | c.13.2.1  | 110              | 1                | 0.50  |
| 169 | d1vgya2 | Carboxypeptidase G2                                         | ddgbadg  | d.58.19.1 | 113              | 3                | 0.53  |
| 170 | d1vja2  | Transglutaminase, two C-terminal domains                    | aabaaadg | b.1.5.1   | 115              | 5                | 0.56  |
| 171 | d1vk5a_ | Hypothetical protein At3g22680                              | llgdjji  | a.220.1.1 | 121              | 2                | 0.81  |
| 172 | d1vlba3 | Aldehyde oxidoreductase, domain 3                           | ggadidg  | d.41.1.1  | 117              | 3                | 0.88  |
| 173 | d1vlga_ | Ferritin                                                    | jjgadjj  | a.25.1.1  | 164              | 12               | 0.60  |
| 174 | d1vsra_ | Very short patch repair endonuclease                        | ggbbdgd  | c.52.1.15 | 134              | 2                | 0.65  |
| 175 | d1wlfa1 | Peroxisome biogenesis factor 1, N-terminal domain           | ddjhaab  | b.52.2.3  | 80               | 6                | 0.52  |

| id. | domain  | description                                                   | topology | class     | $N_{res}$ | $N_{cha}$ | SPACI |
|-----|---------|---------------------------------------------------------------|----------|-----------|-----------|-----------|-------|
| 176 | d1wmub_ | Hemoglobin, beta-chain                                        | jjjjjj   | a.1.1.2   | 146       | 2         | 0.68  |
| 177 | d2cbla2 | N-terminal domain of cbl                                      | ddgejjj  | a.48.1.1  | 131       | 6         | 0.45  |
| 178 | d2cbp__ | Pseudoazurin                                                  | hhaadga  | b.6.1.1   | 96        | 6         | 0.65  |
| 179 | d2cpl__ | Cyclophilin (eukaryotic)                                      | aadgaag  | b.62.1.1  | 164       | 2         | 0.69  |
| 180 | d2cy3__ | Cytochrome c3                                                 | aaagdk   | a.138.1.1 | 118       | 3         | 0.59  |
| 181 | d2end__ | T4 endonuclease V                                             | ggejgad  | a.18.1.1  | 137       | 5         | 0.83  |
| 182 | d2gdm__ | Leghemoglobin                                                 | jjjjgdjj | a.1.1.2   | 153       | 5         | 0.62  |
| 183 | d2sak__ | Staphylokinase                                                | aaadhaa  | d.15.5.1  | 121       | 2         | 0.61  |
| 184 | d3chbd_ | Cholera toxin                                                 | ggaaadg  | b.40.2.1  | 103       | 2         | 0.92  |
| 185 | d3eipa_ | Colicin E3 immunity protein                                   | aadidga  | d.26.2.1  | 84        | 13        | 0.57  |
| 186 | d3sdha_ | Hemoglobin I                                                  | jjjjjjj  | a.1.1.2   | 145       | 4         | 0.81  |
| 187 | d3seb_2 | Staphylococcal enterotoxin A                                  | aadgaadg | d.15.6.1  | 116       | 1         | 0.74  |
| 188 | d3vub__ | CcdB                                                          | aabbaad  | b.34.6.1  | 101       | 1         | 0.76  |
| t1  | d112ya_ | Trp-Cage miniprotein construct TC5b (trp)                     | -        | k.32.1.1  | 20        | 1         | -     |
| t2  | 2a36    | N-terminal SH3 domain of the Drosophila adapter protein (drk) | aaBaCA   | -         | 59        | 6         | -     |
| t3  | d1ubqa_ | Human erythrocytic ubiquitin (ubq)                            | aADhAb   | d.15.1.1  | 76        | 0         | 0.58  |
| t4  | d1tiga_ | Translational initiation factor (if3c)                        | dDGI     | d.68.1.1  | 88        | 5         | 0.53  |
| t5  | d1akia_ | Hen egg-white lysozyme (lys)                                  | jhAFJKJ  | d.2.1.2   | 129       | 8         | 0.65  |

| id. | domain | description                                      | topology | class | $N_{res}$ | $N_{cha}$ | SPACI |
|-----|--------|--------------------------------------------------|----------|-------|-----------|-----------|-------|
| t6  | 2jsw   | C-terminal actin-binding domain of talin (talin) | gGaeJJJ  | -     | 189       | 2         | -     |

Table S3: Parameters of central tendency of log-likelihood log-normal fits of various explicit solvent force distributions. Columns:  $\langle \text{ALL} \rangle$ , all water forces;  $\langle \text{SA} \rangle$ , SASA selected forces;  $\langle \text{SA} \ \& \ \theta \rangle$ , SASA and angle selected forces;  $\langle \text{SA} \ \& \ \theta+ \rangle$ , one-sided SASA and angle selected distribution;  $r \langle \text{SA} \ \& \ \theta+ \rangle$ , the  $\langle \text{SA} \ \& \ \theta+ \rangle$  distribution re-sampled using the 'mean' and 'sd' of the  $\langle \text{SA} \rangle$  distribution; mean, mean value in  $\text{kJ mol}^{-1} \text{nm}^{-1}$ ; sd, standard deviation in  $\text{kJ mol}^{-1} \text{nm}^{-1}$ .

| id. | type | atom description                                   | $\langle \text{ALL} \rangle$ |      | $\langle \text{SA} \rangle$ |      | $\langle \text{SA} \ \& \ \theta \rangle$ |      | $\langle \text{SA} \ \& \ \theta+ \rangle$ |      | $r \langle \text{SA} \ \& \ \theta+ \rangle$ |      |
|-----|------|----------------------------------------------------|------------------------------|------|-----------------------------|------|-------------------------------------------|------|--------------------------------------------|------|----------------------------------------------|------|
|     |      |                                                    | mean                         | sd   | mean                        | sd   | mean                                      | sd   | mean                                       | sd   | mean                                         | sd   |
| 1   | O    | carbonyl oxygen (C=O)                              | 4.83                         | 0.67 | 4.97                        | 0.56 | 4.80                                      | 0.54 | 4.90                                       | 0.61 | 4.99                                         | 0.59 |
| 2   | OM   | carboxyl oxygen (CO <sup>-</sup> )                 | 5.95                         | 0.49 | 5.91                        | 0.47 | 5.94                                      | 0.51 | 5.84                                       | 0.54 | 5.91                                         | 0.46 |
| 3   | OA   | hydroxyl oxygen (OH)                               | 4.68                         | 0.65 | 4.76                        | 0.52 | 4.74                                      | 0.51 | 4.74                                       | 0.55 | 4.73                                         | 0.50 |
| 5   | N    | peptide nitrogen (NH)                              | —                            | —    | —                           | —    | —                                         | —    | —                                          | —    | —                                            | —    |
| 6   | NT   | terminal nitrogen (NH <sub>2</sub> )               | 4.69                         | 0.66 | 4.80                        | 0.52 | 4.66                                      | 0.68 | 4.71                                       | 0.59 | 4.70                                         | 0.46 |
| 7   | NL   | terminal nitrogen (NH <sub>3</sub> <sup>+</sup> )  | 5.89                         | 0.65 | 5.89                        | 0.65 | 6.10                                      | 0.59 | 6.10                                       | 0.63 | 5.86                                         | 0.67 |
| 8   | NR   | aromatic nitrogen (-N=)                            | 4.85                         | 0.91 | 4.33                        | 0.83 | 4.39                                      | 0.69 | 4.30                                       | 0.72 | 4.40                                         | 0.80 |
| 9   | NZ   | Arg amino nitrogen (NH <sub>2</sub> <sup>+</sup> ) | 5.28                         | 0.50 | 5.39                        | 0.42 | 5.53                                      | 0.72 | 5.31                                       | 0.51 | 5.40                                         | 0.40 |
| 10  | NE   | Arg imino nitrogen (NH)                            | —                            | —    | —                           | —    | —                                         | —    | —                                          | —    | —                                            | —    |
| 11  | C    | bare carbon (C)                                    | —                            | —    | —                           | —    | —                                         | —    | —                                          | —    | —                                            | —    |
| 12  | CH1  | aliphatic methine carbon (CH)                      | 2.64                         | 1.40 | 4.14                        | 0.61 | 4.16                                      | 0.50 | 4.09                                       | 0.56 | 3.97                                         | 0.77 |
| 13  | CH2  | methylene carbon (CH <sub>2</sub> )                | 3.70                         | 1.22 | 4.28                        | 0.62 | 4.27                                      | 0.57 | 4.28                                       | 0.63 | 4.24                                         | 0.66 |
| 14  | CH3  | methyl carbon (CH <sub>3</sub> )                   | 3.71                         | 1.73 | 4.16                        | 0.69 | 4.21                                      | 0.59 | 4.21                                       | 0.68 | 3.99                                         | 0.89 |
| 16  | CR1  | aromatic methine carbon (-CH=)                     | 3.13                         | 1.44 | 4.20                        | 0.81 | 3.97                                      | 0.64 | 4.05                                       | 0.76 | 4.14                                         | 0.80 |

Table S4: Solvation parameters  $\sigma_g^{SASA}$  of atom groups derived by partitioning *via* dynamic programming.  $\widehat{\sigma_g^{SASA}}$  : median value; (iqr) : inter-quartile range;  $sd_{bs}$ , standard deviation of the property in 1000 bootstrap (with replacement) samples;  $n$  : number of data points. Data are derived for the angle ranges 0–30° and 150–180° (0–45° and 135–180° in the main text). See Table S3 for a description of the atom types.

| group |             | atom           |                    | solvation parameter                                                  |           |                      |
|-------|-------------|----------------|--------------------|----------------------------------------------------------------------|-----------|----------------------|
| id.   | description | id.            | type               | $\widehat{\sigma_g^{SASA}}$<br>kJ mol <sup>-1</sup> nm <sup>-2</sup> | $sd_{bs}$ | $n(\sigma_g^{SASA})$ |
| 1     | charged     | 2, 7, 9        | OM, NL, NZ         | -26.0 (22.2)                                                         | 0.2       | 15487 [507350]       |
| 2     | polar       | 1, 3, 6, 8     | O, OA, NT, NR      | -7.8 (6.2)                                                           | 0.08      | 8533 [1493950]       |
| 3     | hydrophobic | 12, 13, 14, 16 | CH1, CH2, CH3, CR1 | 4.5 (3.9)                                                            | 0.01      | 68272 [4191050]      |

Table S5: Mutual Information (I), Joint Entropy (H) and the normalised Mutual Information  $I_{norm} = I/H$  of the partitioning *via* dynamic programming into  $k$  groups for  $1 \text{ kJ mol}^{-1} \text{ nm}^{-2}$  binning of the  $\sigma_i$  value range. The maximal  $I_{norm}$  value is emphasised.

| k  | I / nat | H / nat | $I_{norm}$   |
|----|---------|---------|--------------|
| 2  | 0.73    | 3.63    | 0.202        |
| 3  | 0.95    | 4.08    | <i>0.234</i> |
| 4  | 1.02    | 4.41    | 0.232        |
| 5  | 1.05    | 4.62    | 0.227        |
| 6  | 1.06    | 4.82    | 0.220        |
| 7  | 1.07    | 5.02    | 0.214        |
| 8  | 1.08    | 5.24    | 0.207        |
| 9  | 1.09    | 5.29    | 0.206        |
| 10 | 1.09    | 5.40    | 0.203        |
| 11 | 1.10    | 5.47    | 0.201        |
| 12 | 1.10    | 5.63    | 0.196        |
| 13 | 1.11    | 5.74    | 0.193        |
| 14 | 1.11    | 5.84    | 0.190        |
| 15 | 1.11    | 5.90    | 0.188        |
| 16 | 1.11    | 5.99    | 0.186        |
| 17 | 1.12    | 6.14    | 0.182        |
| 18 | 1.12    | 6.06    | 0.184        |
| 19 | 1.12    | 6.21    | 0.180        |
| 20 | 1.12    | 6.22    | 0.180        |

Table S6: Original implicit solvation parameters<sup>2</sup> for GROMOS atom types.<sup>3</sup>

| id. | type | atom                                               | solvation parameter                          |
|-----|------|----------------------------------------------------|----------------------------------------------|
|     |      | description                                        | $\sigma_i/\text{kJ mol}^{-1} \text{nm}^{-2}$ |
| 1   | O    | carbonyl oxygen (C=O)                              | -25                                          |
| 2   | OM   | carboxyl oxygen (CO <sup>-</sup> )                 | -25                                          |
| 3   | OA   | hydroxyl oxygen (OH)                               | -25                                          |
| 5   | N    | peptide nitrogen (NH)                              | -25                                          |
| 6   | NT   | terminal nitrogen (NH <sub>2</sub> )               | -25                                          |
| 7   | NL   | terminal nitrogen (NH <sub>3</sub> <sup>+</sup> )  | -25                                          |
| 8   | NR   | aromatic nitrogen (-N=)                            | -25                                          |
| 9   | NZ   | Arg amino nitrogen (NH <sub>2</sub> <sup>+</sup> ) | -25                                          |
| 10  | NE   | Arg imino nitrogen (NH)                            | -25                                          |
| 11  | C    | bare carbon (C)                                    | 5                                            |
| 12  | CH1  | aliphatic methine carbon (CH)                      | 5                                            |
| 13  | CH2  | methylene carbon (CH <sub>2</sub> )                | 5                                            |
| 14  | CH3  | methyl carbon (CH <sub>3</sub> )                   | 5                                            |
| 16  | CR1  | aromatic methine carbon (-CH=)                     | 5                                            |

## References

- (1) Brenner, S. E.; Koehl, P.; Levitt, M. *Nucleic Acids Res* **2000**, 28, 254–256.
- (2) Fraternali, F.; van Gunsteren, W. F. *J Mol Biol* **1996**, 256, 939–948.
- (3) van Gunsteren, W. F.; Billeter, S. R.; Eising, A. A.; Hünenberger, P. H.; Krüger, P.; Mark, A. E.; Scott, W. R. P.; Tironi, I. G. *Biomolecular Simulation: The GROMOS96 Manual and User Guide*; vdf Hochschulverlag AG an der ETH Zürich and BIOMOS b.v., 1996.
